# Supplementary material for: Accurate microRNA annotation of animal genomes using trained covariance models of curated microRNA complements in MirMachine
Source: PubMed Central journal article supplement — Cell Genom. 2023 Jun 23;3(8):100348. doi: 10.1016/j.xgen.2023.100348 (PMC10435380; doi:10.1016/j.xgen.2023.100348), 2023-06-23
Supplement: mmc1.pdf [file mmc1.pdf]

**Cell Genomics, Volume 3**

**Supplemental information**

**Accurate microRNA annotation of animal genomes  
using trained covariance models  
of curated microRNA complements in MirMachine**

**Sinan Uğur Umu, Vanessa M. Paynter, Håvard Trondsen, Tilo Buschmann, Trine B. Rounge, Kevin J. Peterson, and Bastian Fromm**

Figure S1

A protostome MIR-2

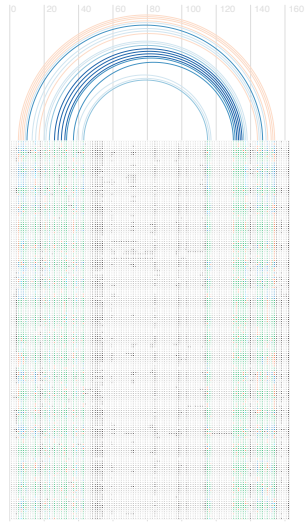

B protostome MIR-71

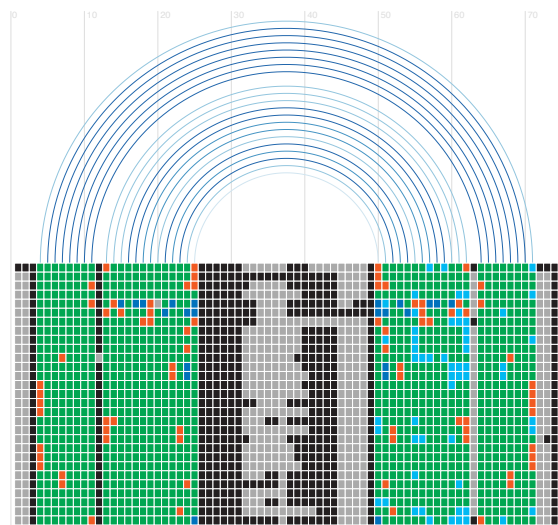

C deuterostome MIR-150

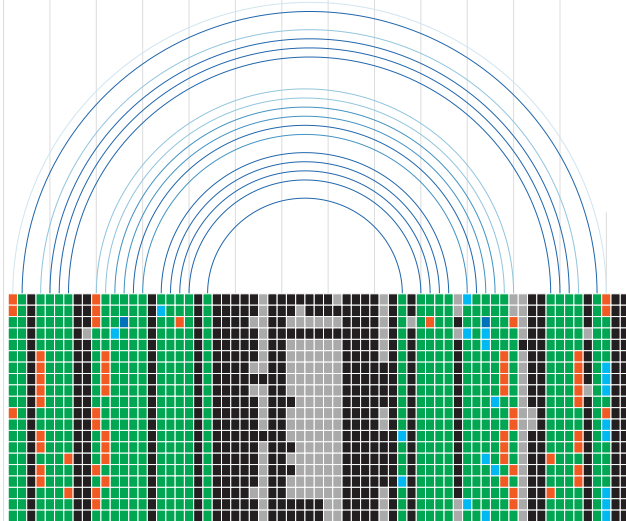

D combined LET-7

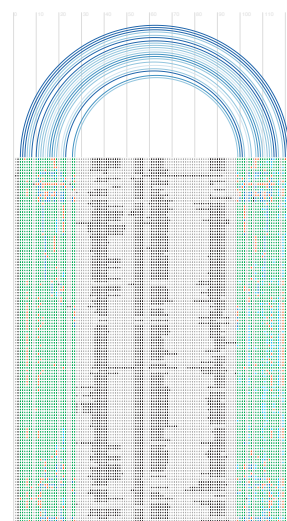

■ Conservation   ■ Covariation   ■ One-sided   ■ Invalid   ■ Unpaired   ■ Gap

Figure S1: Graphical representation of CMs of four representative microRNA familie, related to figure 2a A) MIR-2, B) MIR-71, C) MIR-150, D) LET-7. Conserved base pairs are colored in green. Blue indicates a compensatory mutation relative to the green pairs (dark blue for a double-sided mutation, light blue for a one-sided mutation). Non-canonical paired bases are red, non-base-pairing bases are black. Graphical representations of all CMs used by MirMachine can be found on github ([10.5281/zenodo.7897616](https://github.com/10.5281/zenodo.7897616) & [https://github.com/sinanugur/MirMachine-supplementary/tree/main/CM\\_figures](https://github.com/sinanugur/MirMachine-supplementary/tree/main/CM_figures)).

Figure S2

A MIR-1677 alignment

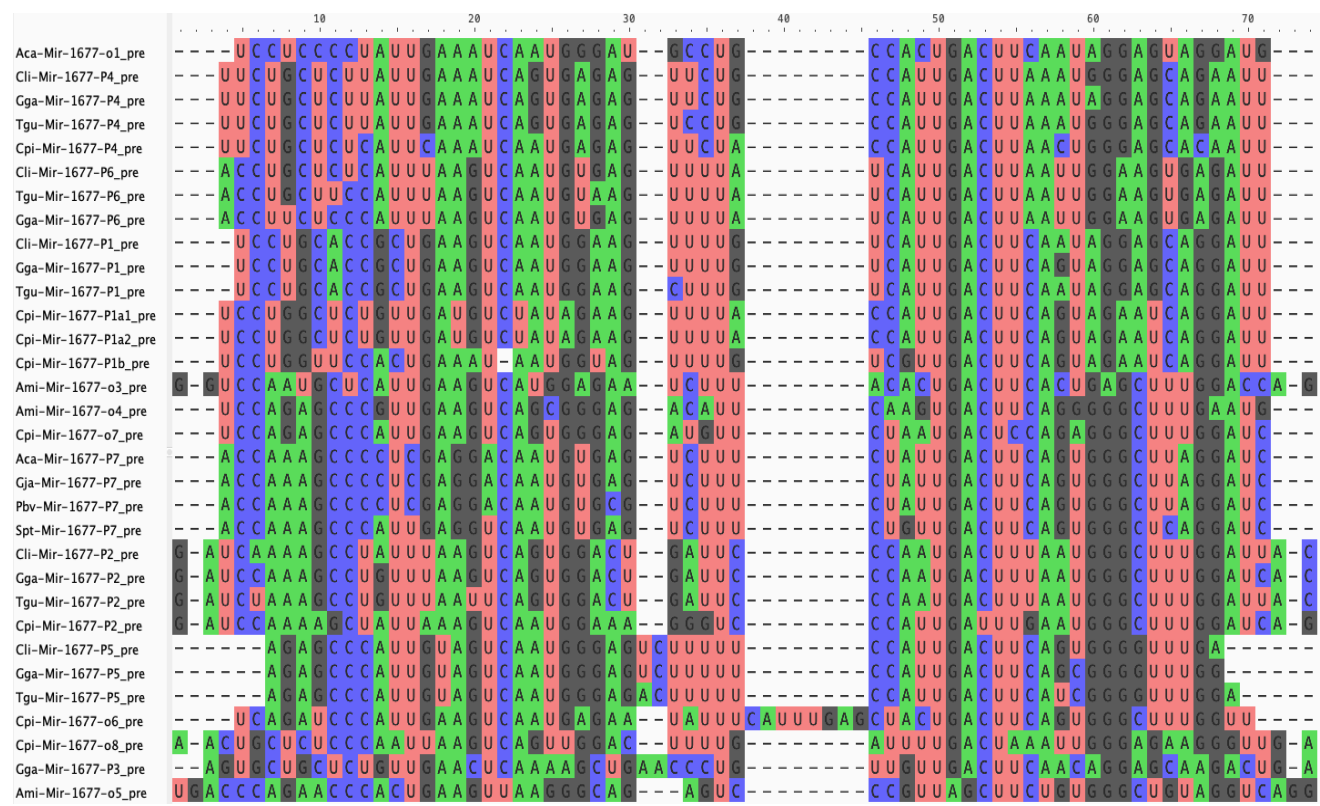

B MIR-1677 Covariance Model of non-redundant members

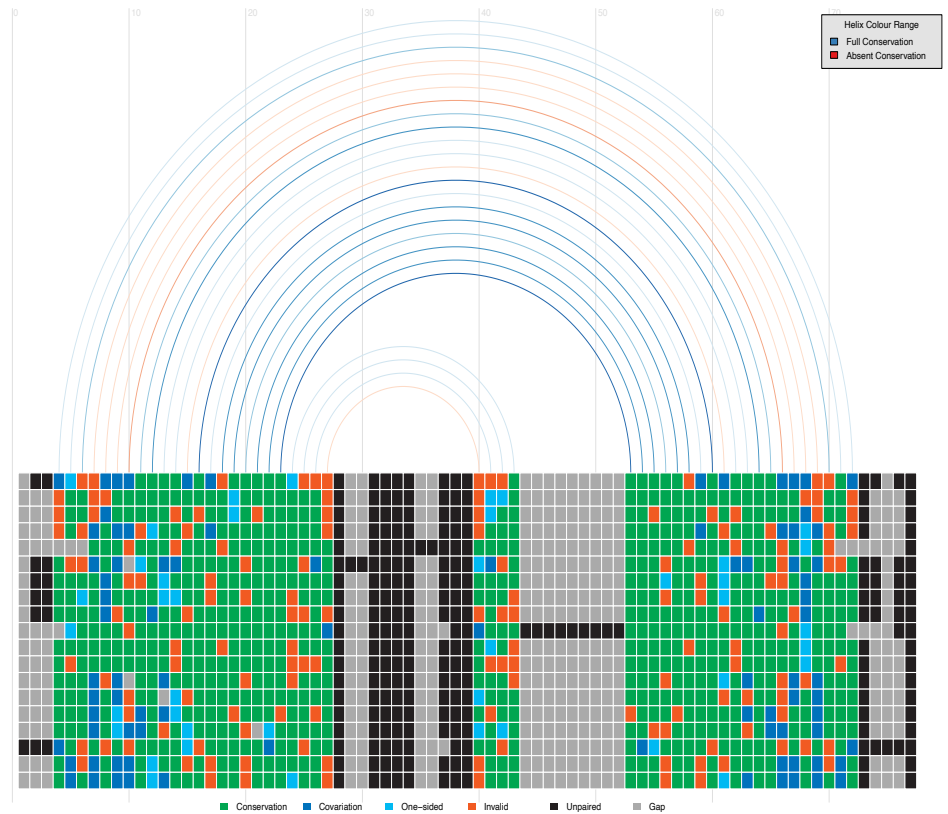

Figure S2: MIR-1677 is a highly deviating microRNA family, related to figure 2b. A) Alignment of MIR-1677 genes from MirGeneDB shows low conservation that explains poor performance of B) MIR-1677 CMs in MirMachine.

Figure S3

Whole genome alignments miss many real microRNAs and include many false-positives

**A** WGA can be used to report alignments of microRNAs

**B** MirMachine predictions of 90 eutherians (Ensembl)

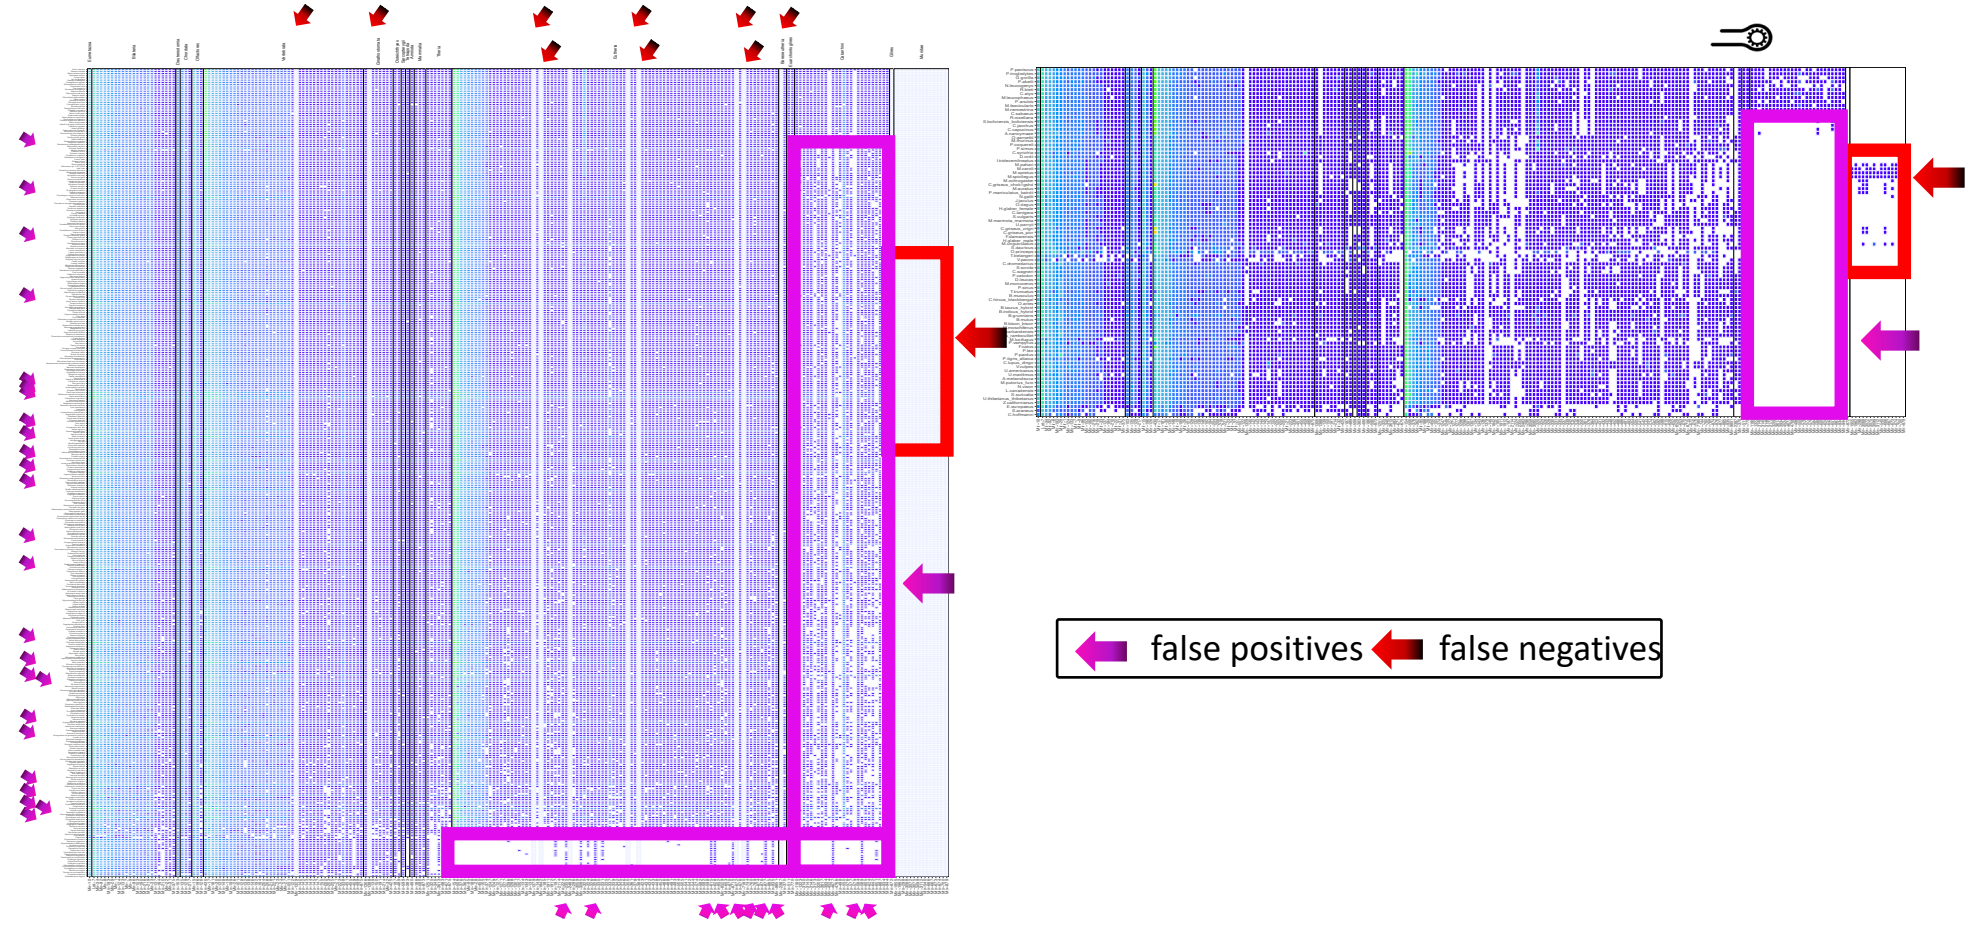

Figure S3: Whole genome alignments miss many real microRNAs and include many false-positives, related to figure 5a. When comparing overall performance of (A) alignments reported for each of the 470 mammalian species, the overall impression is that many microRNA loci in human are aligned in a majority of mammalian genomes. However, when comparing to the MirMachine output (B), a number of bona fide microRNA families are not reported (red arrows) due to their absence in the human reference (red box: murid microRNA families). Additionally, a high number families and genes that are not expected (pink boxes) given the phylogenetic level of the species (i.e. not Eutherian, not Catharrini) is reported, which seems unlikely to be correct. This also goes for very high number of copies in a number of species (pink arrows left site of A) that would indicate genome duplication, which have not been reported, and likely are false calls.



Figure S5

Whole genome alignments can identify orthologous loci, but cannot distinguish between real microRNAs and non-genes

**A** eutherian-specific

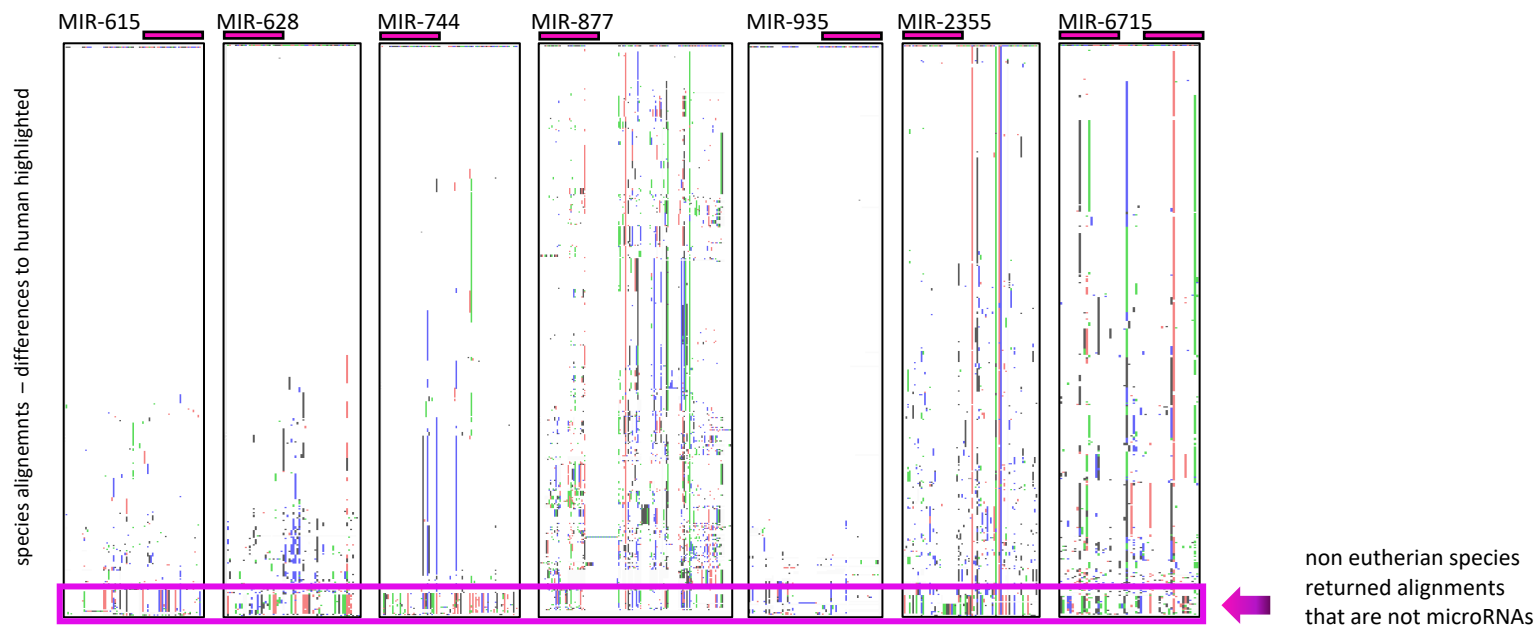

**B** Catharrini-specific

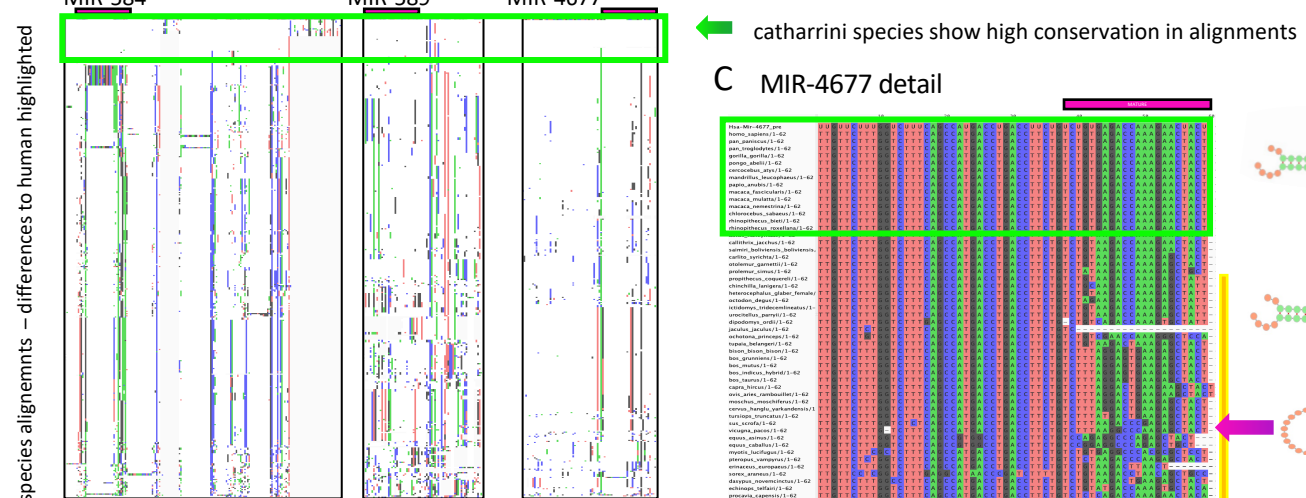

**C** MIR-4677 detail

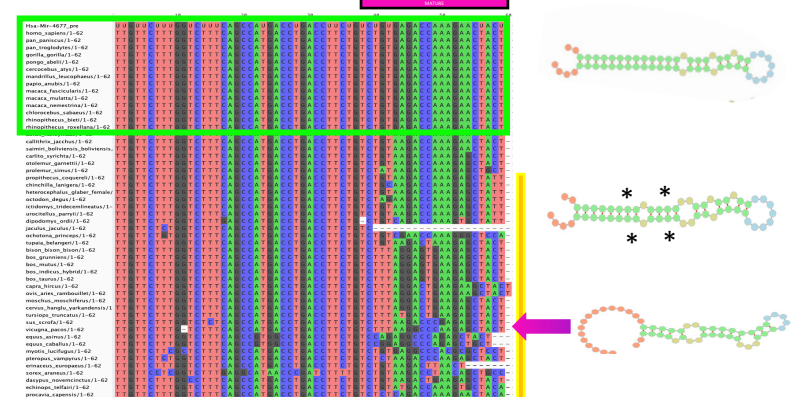

Figure S5: While genome alignments can identify candidates of orthologues loci, they cannot distinguish between real microRNAs and non-microRNA loci, related to figure 5a. Alignments of identified microRNA loci show strong variation especially in loci of species unknown to have the corresponding microRNA. Examples shown for A) eutherian-specific and B) Catharrini-specific microRNA families in non-eutherian and non-Catharrini species shows that, while having alignment reported, there are substantial differences indicating that these are either 1) incorrect alignments or 2) that aligned loci do not contain microRNA genes. In C) (MIR-4677 detail) clear differences in nucleotide composition shows the effect of these sequences on the actual structure of the putative microRNAs clearly ruling out a processing as microRNA. A&B) Each plot highlights the differences to the human reference (white = 100% conserved sites)

Figure S6

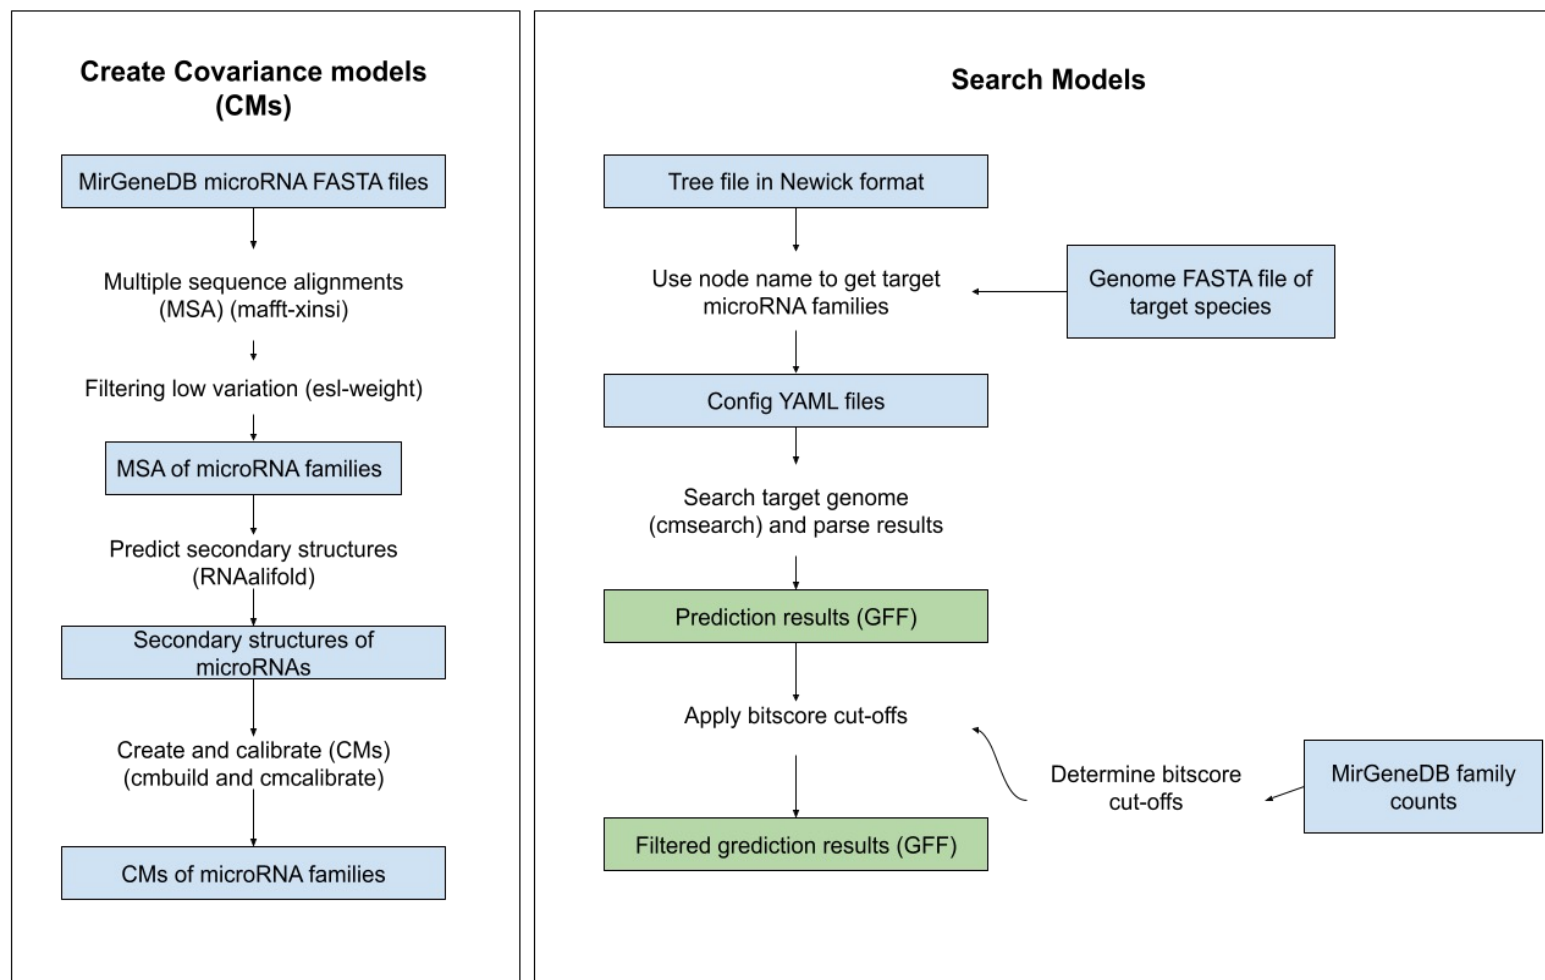

Figure S6. A summary of MirMachine workflow: high-quality CMs were generated using Infernal based on MirGeneDB v2.1 microRNA families, related to figure 2. Bitscore cut-offs were determined using MirGeneDB to maximize MCC scores. We use the cutoffs to filter out low quality predictions.
